# Supplementary material for: Self-Assembled Nanomaterials Based on Complementary Sn(IV) and Zn(II)-Porphyrins, and Their Photocatalytic Degradation for Rhodamine B Dye
Source: MDPI journal article supplement (doi:10.3390/molecules26123598), 2021-06-11
Supplement: s1 [file s1]

## Supplementary Materials

### Self-assembled Nanomaterials Based on Complementary Sn(IV) and Zn(II)-porphyrins, and Their Photocatalytic Degradation for Rhodamine B Dye

Nirmal Kumar Shee and Hee-Joon Kim\*

*Department of Applied Chemistry, Kumoh National Institute of Technology  
61 Daehak-ro, Gumi 39177, Republic of Korea*

#### List of contents:

**Figure S1.**  $^1\text{H}$  NMR spectrum of *meso*-5-(4-hydroxyphenyl)-10,15,20-tris(phenyl)porphyrin **H<sub>2</sub>L<sup>1</sup>** in  $\text{CDCl}_3$ .

**Figure S2.**  $^1\text{H}$  NMR spectrum of *meso*-5-(4-hydroxyphenyl)-10,15,20-tris(4-methylphenyl)porphyrin **H<sub>2</sub>L<sup>2</sup>** in  $\text{CDCl}_3$ .

**Figure S3.**  $^1\text{H}$  NMR spectrum of *meso*-5-(4-hydroxyphenyl)-10,15,20-tris(4-*tert*-butylphenyl)porphyrin **H<sub>2</sub>L<sup>3</sup>** in  $\text{CDCl}_3$ .

**Figure S4.**  $^1\text{H}$  NMR spectrum of *meso*-5-(4-hydroxyphenyl)-10,15,20-tris(4-methoxyphenyl)porphyrin **H<sub>2</sub>L<sup>4</sup>** in  $\text{CDCl}_3$ .

**Figure S5.**  $^1\text{H}$  NMR spectrum of *meso*-5-(4-hydroxyphenyl)-10,15,20-tris(4-chlorophenyl)porphyrin **H<sub>2</sub>L<sup>5</sup>** in  $\text{CDCl}_3$ .

**Figure S6.**  $^1\text{H}$  NMR spectrum of *meso*-5-(4-hydroxyphenyl)-10,15,20-tris(4-nitrophenyl)porphyrin **H<sub>2</sub>L<sup>6</sup>** in  $\text{CDCl}_3$ .

**Figure S7.**  $^1\text{H}$  NMR spectrum of *meso*-5-(4-hydroxyphenyl)-10,15,20-tris(phenyl)porphyrinato)zinc(II) **ZnL<sup>1</sup>** in DMSO- $\text{d}_6$ .

**Figure S8.**  $^1\text{H}$  NMR spectrum of *meso*-5-(4-hydroxyphenyl)-10,15,20-tris(4-methylphenyl)porphyrinato)zinc(II) **ZnL<sup>2</sup>** in DMSO- $\text{d}_6$ .

**Figure S9.**  $^1\text{H}$  NMR spectrum of *meso*-5-(4-hydroxyphenyl)-10,15,20-tris(4-*tert*-butylphenyl)porphyrinato)zinc(II) **ZnL<sup>3</sup>** in DMSO- $\text{d}_6$ .

**Figure S10.**  $^1\text{H}$  NMR spectrum of *meso*-5-(4-hydroxyphenyl)-10,15,20-tris(4-methoxyphenyl)porphyrinato)zinc(II) **ZnL<sup>4</sup>** in DMSO- $\text{d}_6$ .

**Figure S11.**  $^1\text{H}$  NMR spectrum of *meso*-5-(4-hydroxyphenyl)-10,15,20-tris(4-chlorophenyl)porphyrinato)zinc(II) **ZnL<sup>5</sup>** in DMSO- $\text{d}_6$ .

**Figure S12.**  $^1\text{H}$  NMR spectrum of *meso*-5-(4-hydroxyphenyl)-10,15,20-tris(4-nitrophenyl)porphyrinato)zinc(II) **ZnL<sup>6</sup>** in DMSO- $\text{d}_6$ .

**Figure S13.**  $^1\text{H}$  NMR spectrum of triad **1** in DMSO- $\text{d}_6$ .

**Figure S14.**  $^1\text{H}$  NMR spectrum of triad **2** in DMSO- $\text{d}_6$ .

**Figure S15.**  $^1\text{H}$  NMR spectrum of triad **3** in DMSO- $\text{d}_6$ .

**Figure S16.**  $^1\text{H}$  NMR spectrum of triad **4** in DMSO- $\text{d}_6$ .

**Figure S17.**  $^1\text{H}$  NMR spectrum of triad **5** in DMSO- $\text{d}_6$ .

**Figure S18.**  $^1\text{H}$  NMR spectrum of triad **6** in DMSO- $\text{d}_6$ .

**Figure S19.** ESI-MS spectrum of triad **1**.

**Figure S20.** ESI-MS spectrum of triad **2**.

**Figure S21.** ESI-MS spectrum of triad **3**.

**Figure S22.** ESI-MS spectrum of triad **4**.

**Figure S23.** ESI-MS spectrum of triad **5**.

**Figure S24.** ESI-MS spectrum of triad **6**.

**Figure S25.** Lower magnification of FE-SEM images for the assembly patterns of triads: (a) **1**; (b) **2**; (c) **3**; (d) **4**; (e) **5**; (f) **6**.

**Figure S26.** Absorption spectra of RhB in the presence of nano fibers derived from triad **3** under visible light irradiation.

**Figure S27.** Kinetics for the photocatalytic degradation of RhB under visible light irradiation of the six triads (**1-6**).

**Figure S28.** Catalytic cycles (up to 5 cycles) using triad **3** as a photocatalyst for the degradation of RhB.

**Figure S29.** Schematic representation of the detection of the hydroxyl and superoxide radical anion that were generated during the photodegradation experiments.

**Figure S30.** UV-visible spectra of coumarin in the presence of triad **3** in water.  $\lambda_{\text{ex}} = 325$  nm and light exposure time (30 min).

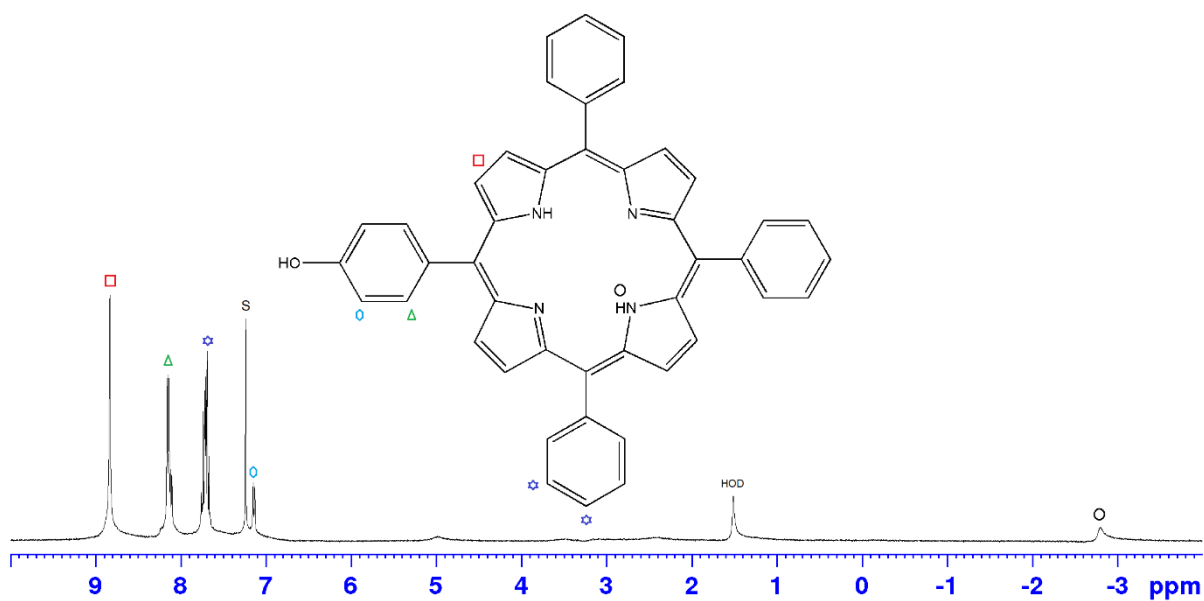

**Figure S1.**  $^1\text{H}$  NMR spectrum of *meso*-5-(4-hydroxyphenyl)-10,15,20-tris(phenyl)porphyrin **H<sub>2</sub>L<sup>1</sup>** in  $\text{CDCl}_3$ .

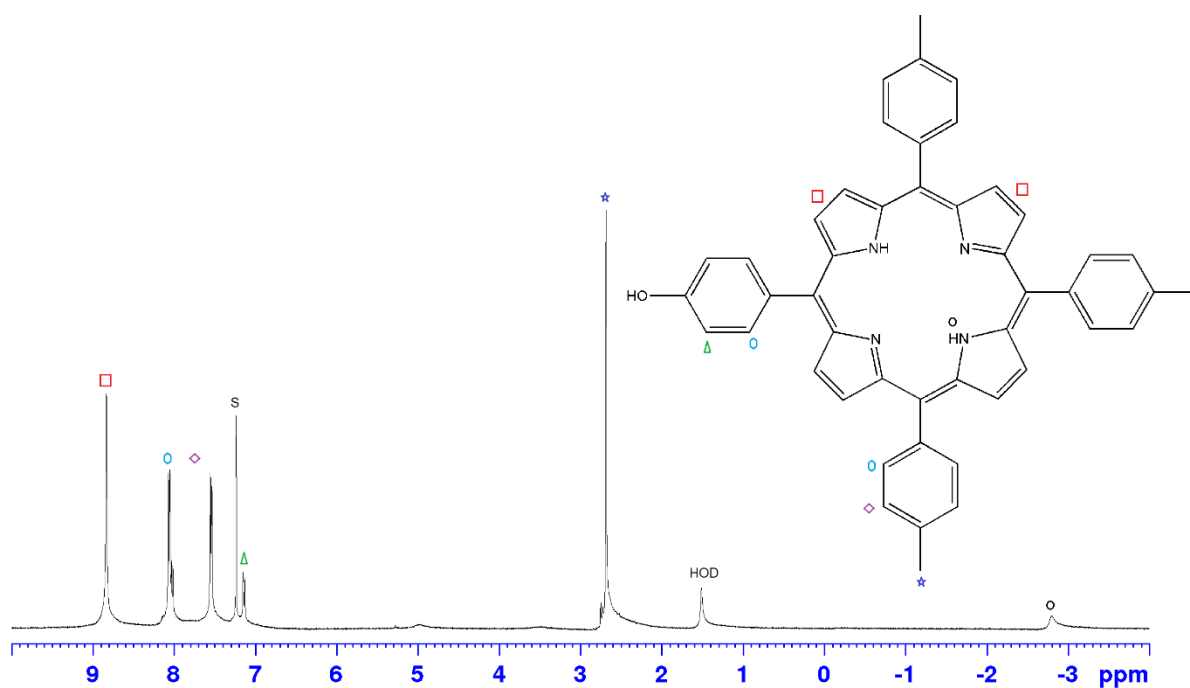

**Figure S2.**  $^1\text{H}$  NMR spectrum of *meso*-5-(4-hydroxyphenyl)-10,15,20-tris(4-methylphenyl)porphyrin **H<sub>2</sub>L<sup>2</sup>** in  $\text{CDCl}_3$ .

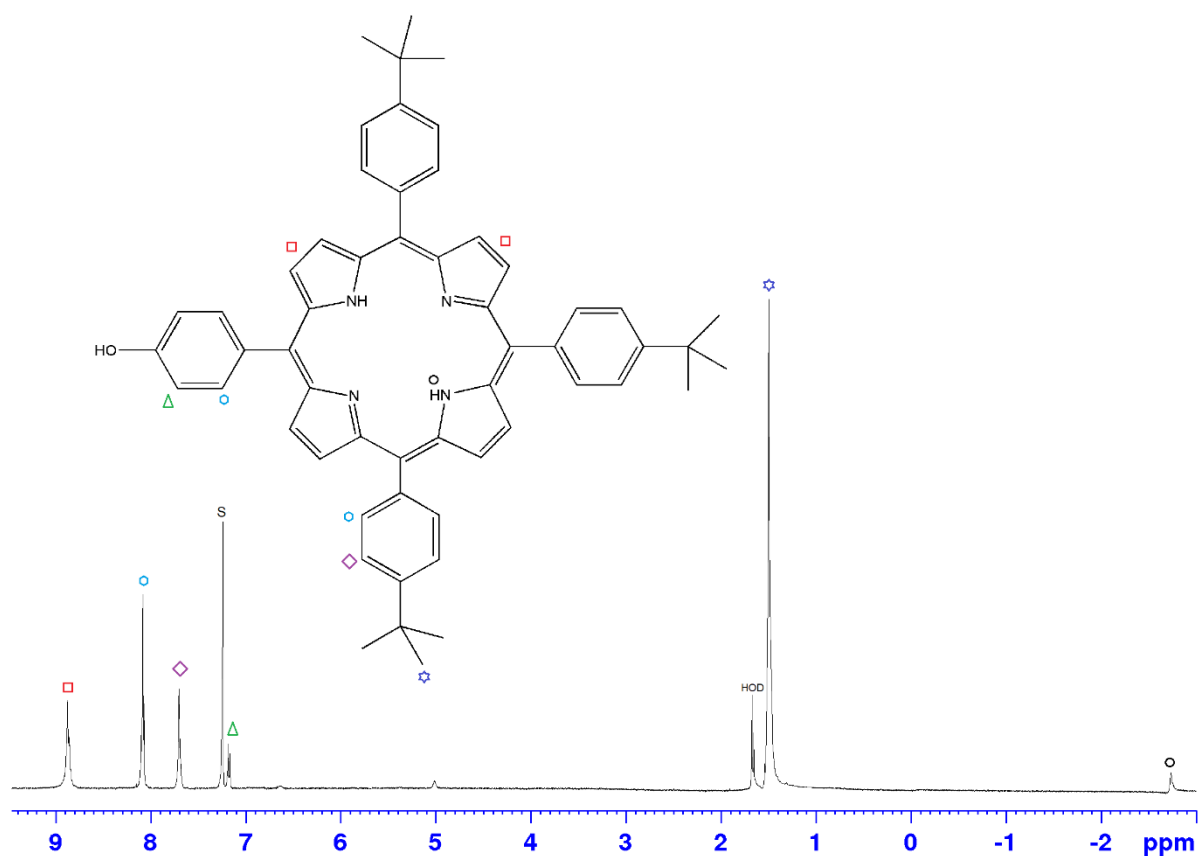

**Figure S3.** <sup>1</sup>H NMR spectrum of *meso*-5-(4-hydroxyphenyl)-10,15,20-tris(4-*tert*-butylphenyl)porphyrin **H<sub>2</sub>L<sup>3</sup>** in CDCl<sub>3</sub>.

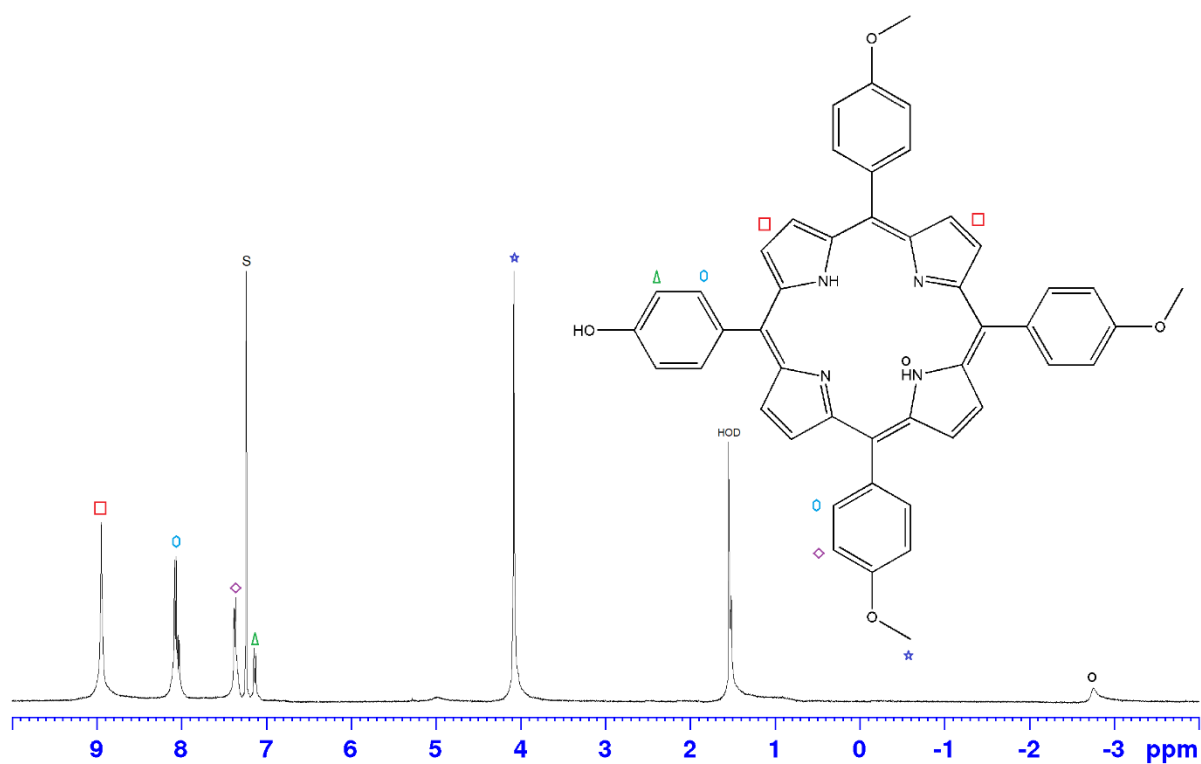

**Figure S4.** <sup>1</sup>H NMR spectrum of *meso*-5-(4-hydroxyphenyl)-10,15,20-tris(4-methoxyphenyl)porphyrin **H<sub>2</sub>L<sup>4</sup>** in CDCl<sub>3</sub>.

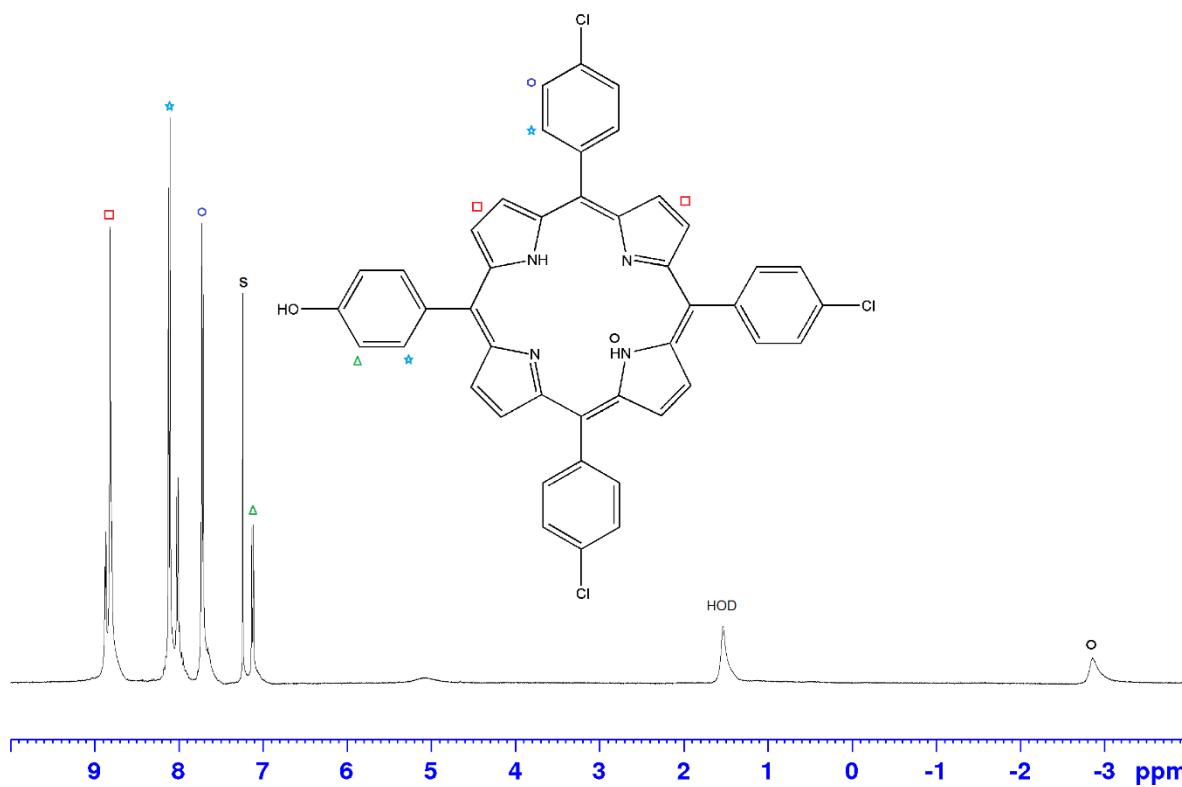

**Figure S5.**  $^1\text{H}$  NMR spectrum of *meso*-5-(4-hydroxyphenyl)-10,15,20-tris(4-chlorophenyl)porphyrin **H<sub>2</sub>L<sup>5</sup>** in  $\text{CDCl}_3$ .

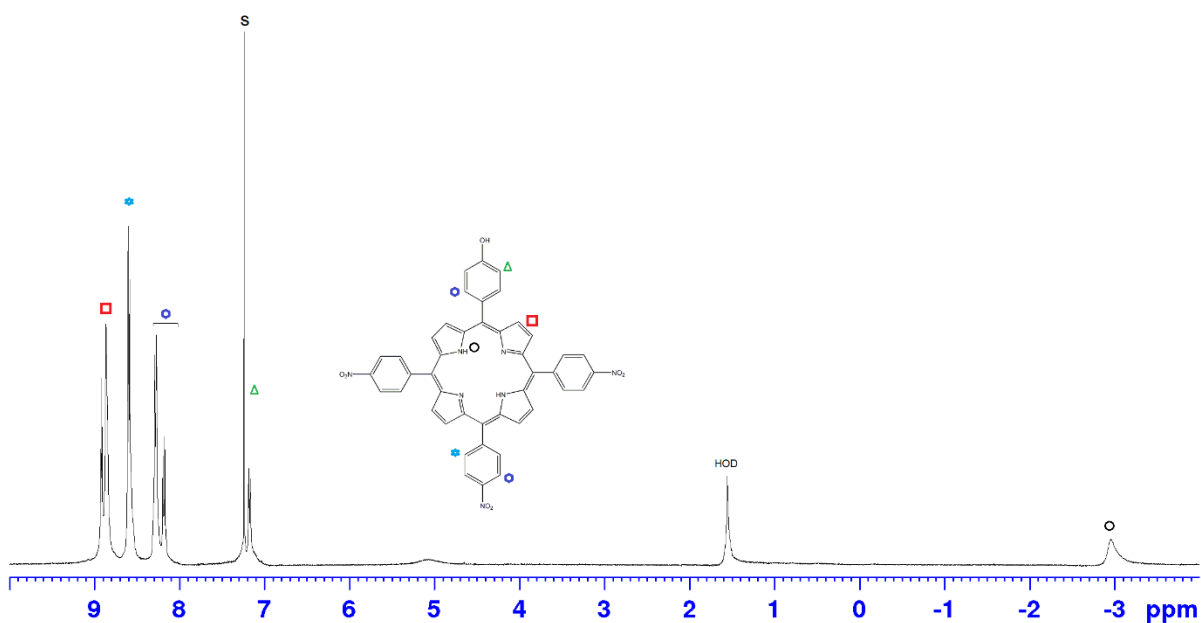

**Figure S6.**  $^1\text{H}$  NMR spectrum of *meso*-5-(4-hydroxyphenyl)-10,15,20-tris(4-nitrophenyl)porphyrin **H<sub>2</sub>L<sup>6</sup>** in  $\text{CDCl}_3$ .

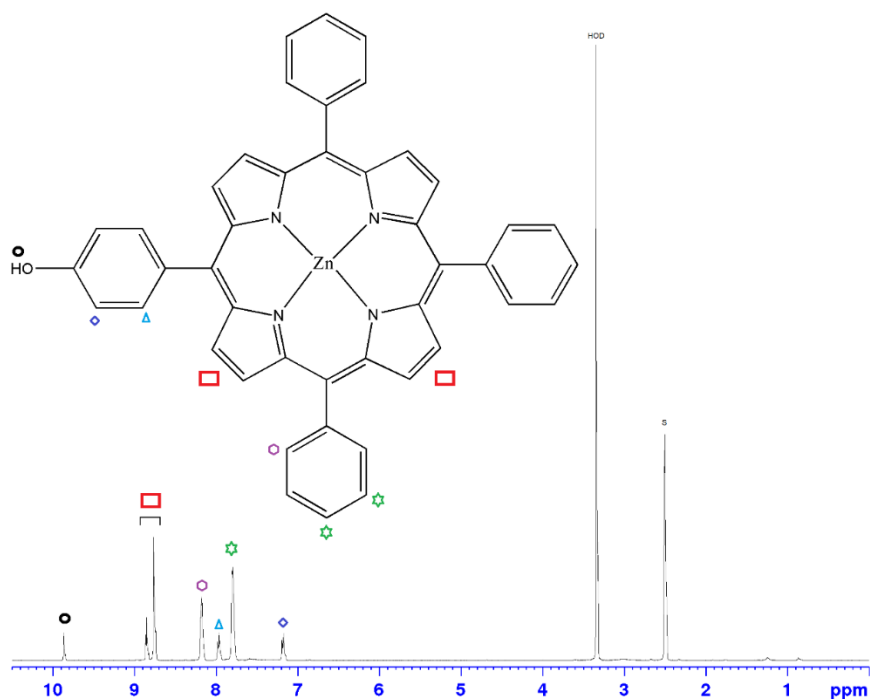

**Figure S7.**  $^1\text{H}$  NMR spectrum of *meso*-5-(4-hydroxyphenyl)-10,15,20-tris(phenyl)porphyrinato)zinc(II) **ZnL<sup>1</sup>** in DMSO- $\text{d}_6$ .

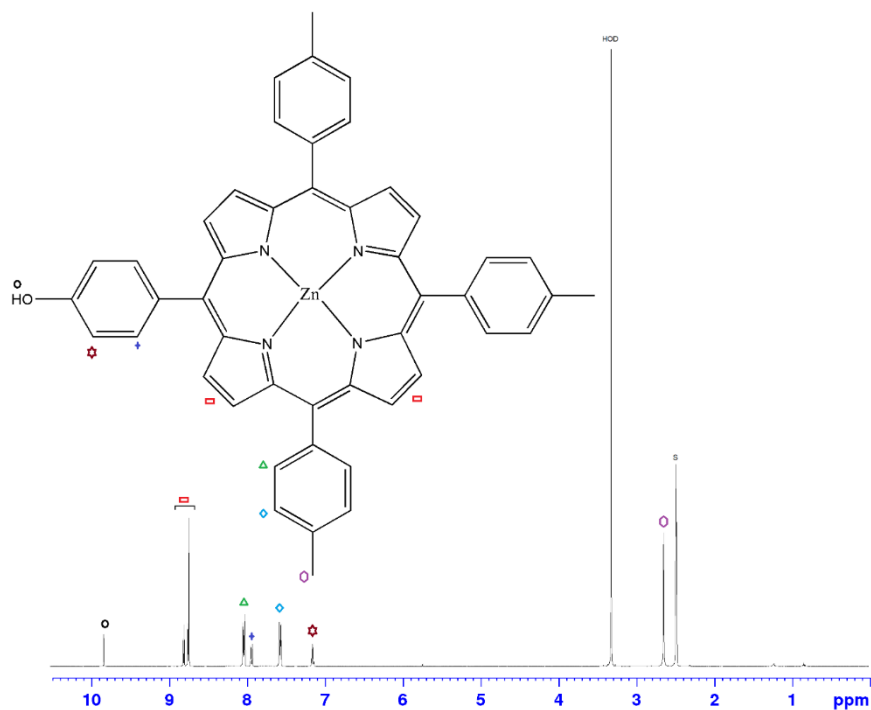

**Figure S8.**  $^1\text{H}$  NMR spectrum of *meso*-5-(4-hydroxyphenyl)-10,15,20-tris(4-methylphenyl)porphyrinato)zinc(II) **ZnL<sup>2</sup>** in DMSO- $\text{d}_6$ .

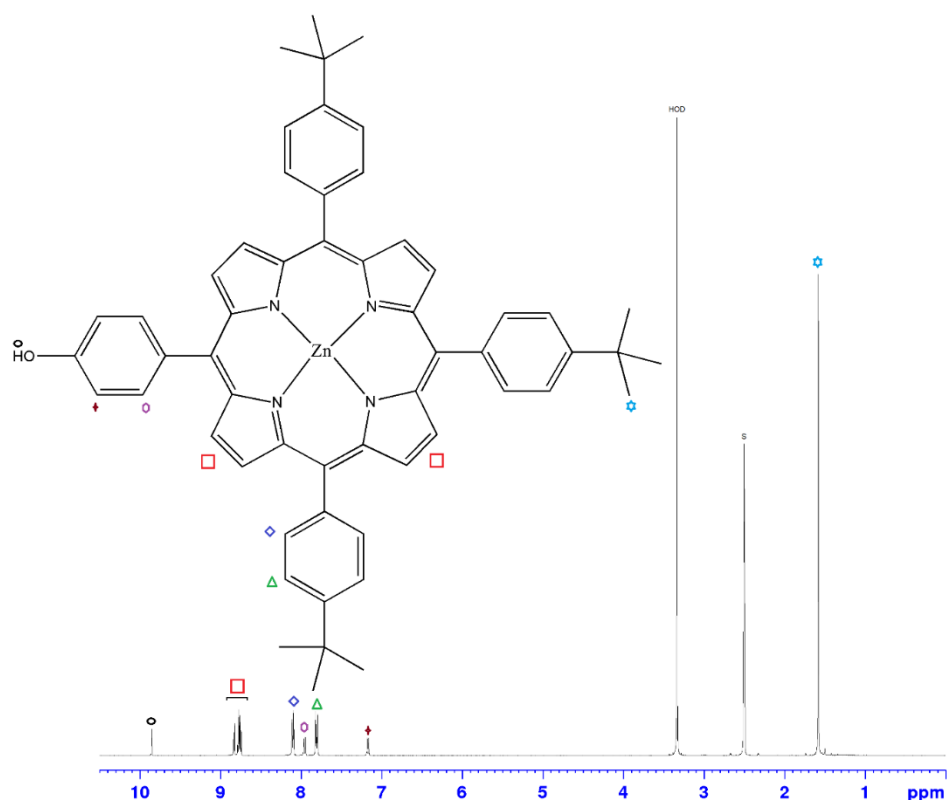

**Figure S9.**  $^1\text{H}$  NMR spectrum of *meso*-5-(4-hydroxyphenyl)-10,15,20-tris(4-*tert*-butylphenyl)porphyrinato)zinc(II) **ZnL<sup>3</sup>** in DMSO- $\text{d}_6$ .

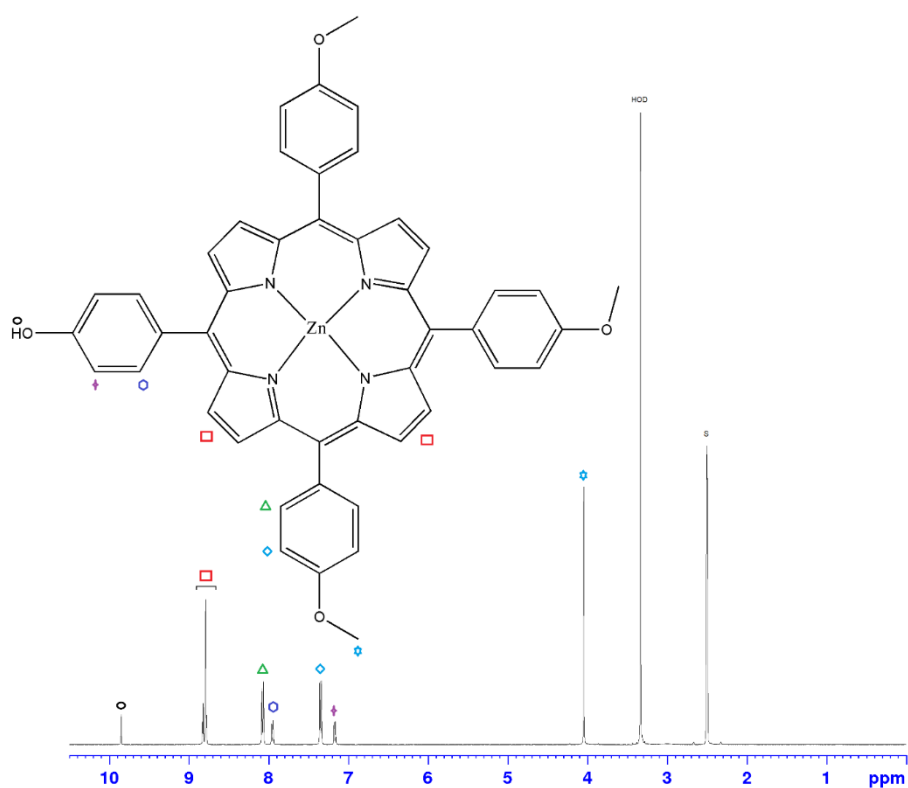

**Figure S10.**  $^1\text{H}$  NMR spectrum of *meso*-5-(4-hydroxyphenyl)-10,15,20-tris(4-methoxyphenyl)porphyrinato)zinc(II) **ZnL<sup>4</sup>** in DMSO- $\text{d}_6$ .

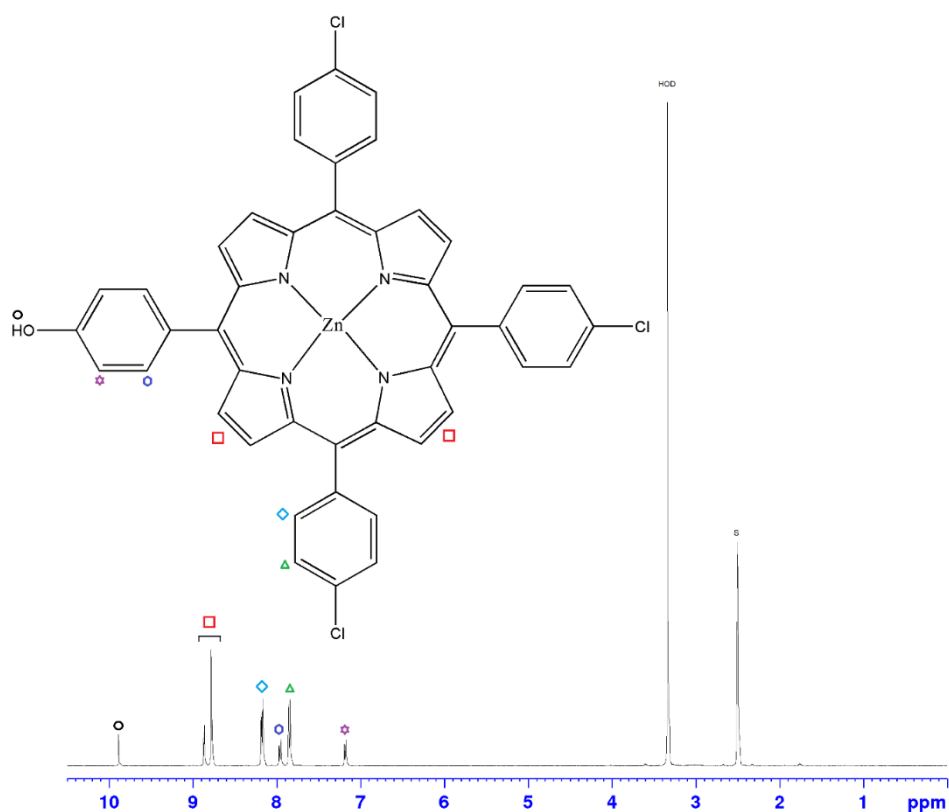

**Figure S11.**  $^1\text{H}$  NMR spectrum of *meso*-5-(4-hydroxyphenyl)-10,15,20-tris(4-chlorophenyl)porphyrinato)zinc(II) **ZnL<sup>5</sup>** in DMSO- $\text{d}_6$ .

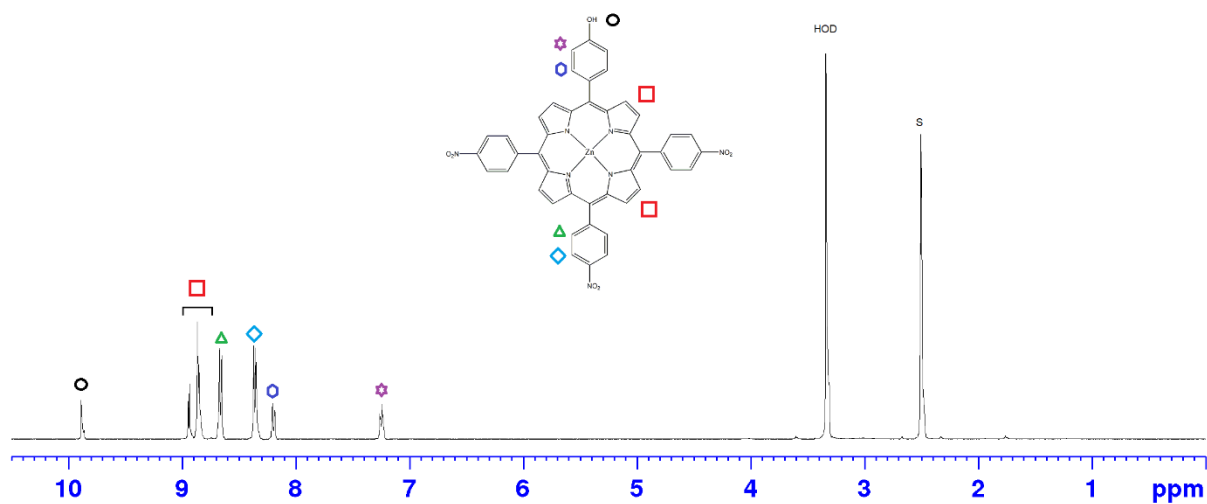

**Figure S12.**  $^1\text{H}$  NMR spectrum of *meso*-5-(4-hydroxyphenyl)-10,15,20-tris(4-nitrophenyl)porphyrinato)zinc(II) **ZnL<sup>6</sup>** in DMSO- $\text{d}_6$ .



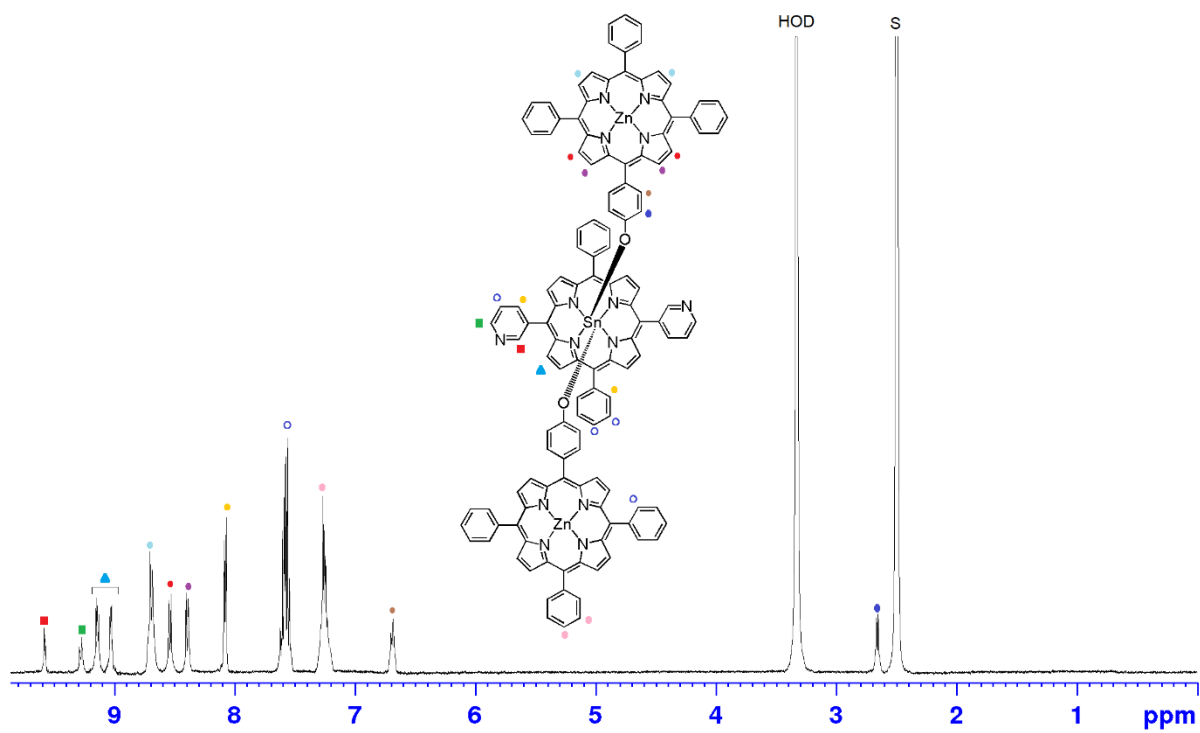

**Figure S13.**  $^1\text{H}$  NMR spectrum of triad **1** in  $\text{DMSO-d}_6$ .

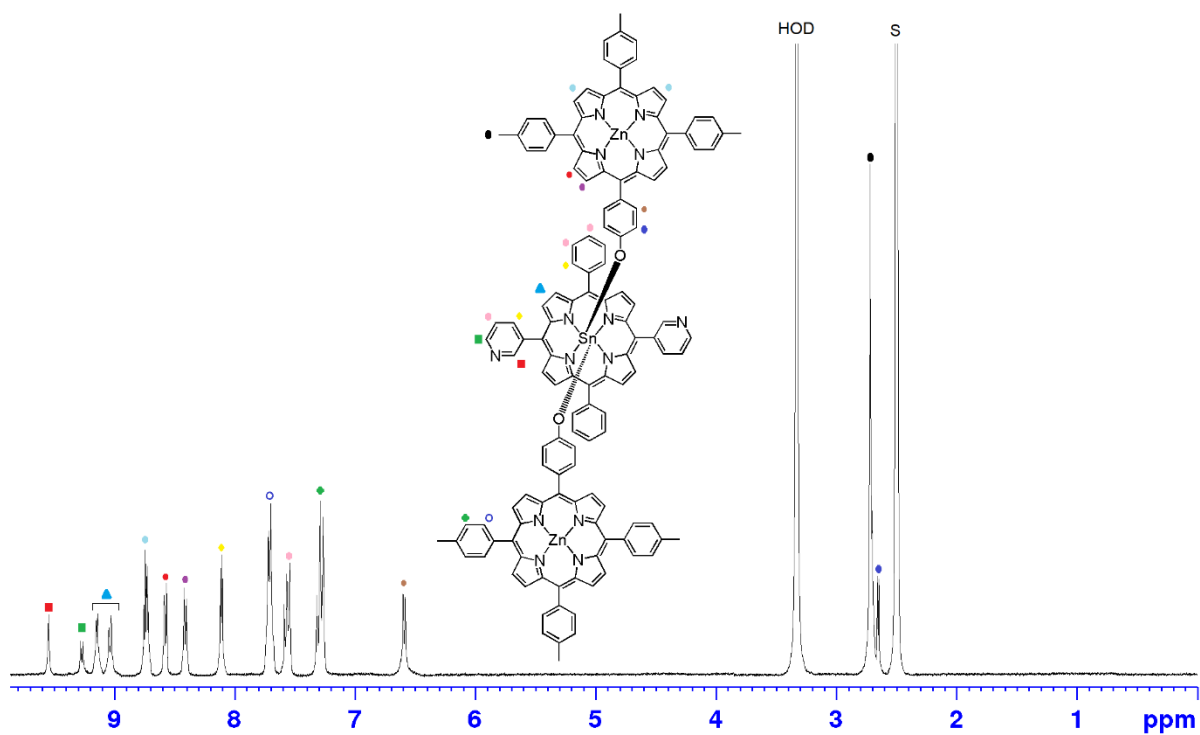

**Figure S14.**  $^1\text{H}$  NMR spectrum of triad **2** in  $\text{DMSO-d}_6$ .

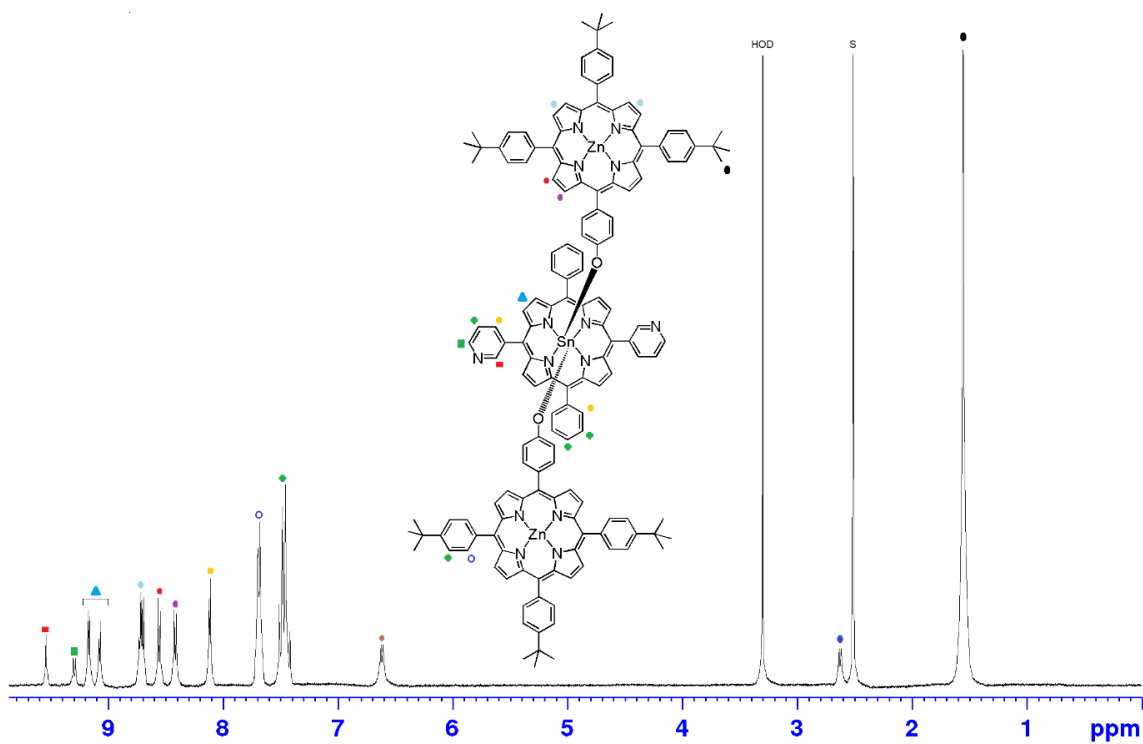

**Figure S15.** <sup>1</sup>H NMR spectrum of triad **3** in DMSO-d<sub>6</sub>.

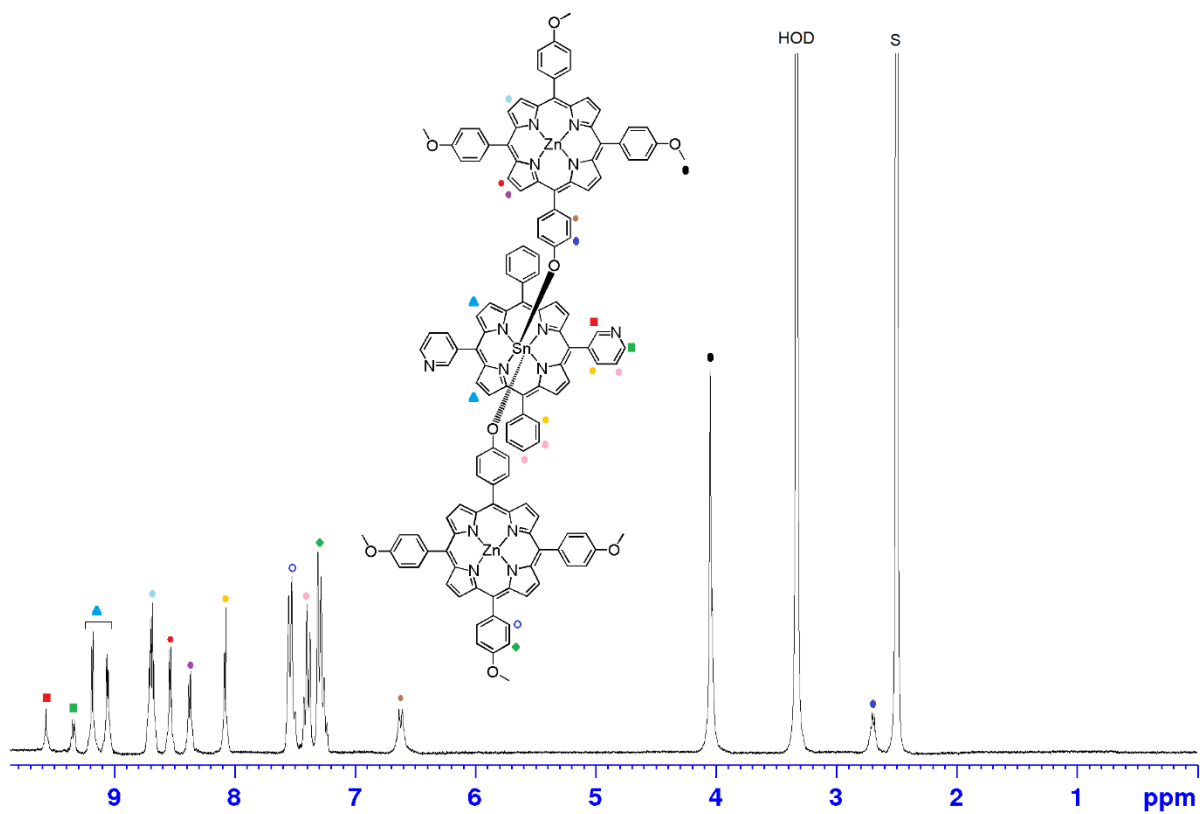

**Figure S16.** <sup>1</sup>H NMR spectrum of triad **4** in DMSO-d<sub>6</sub>.

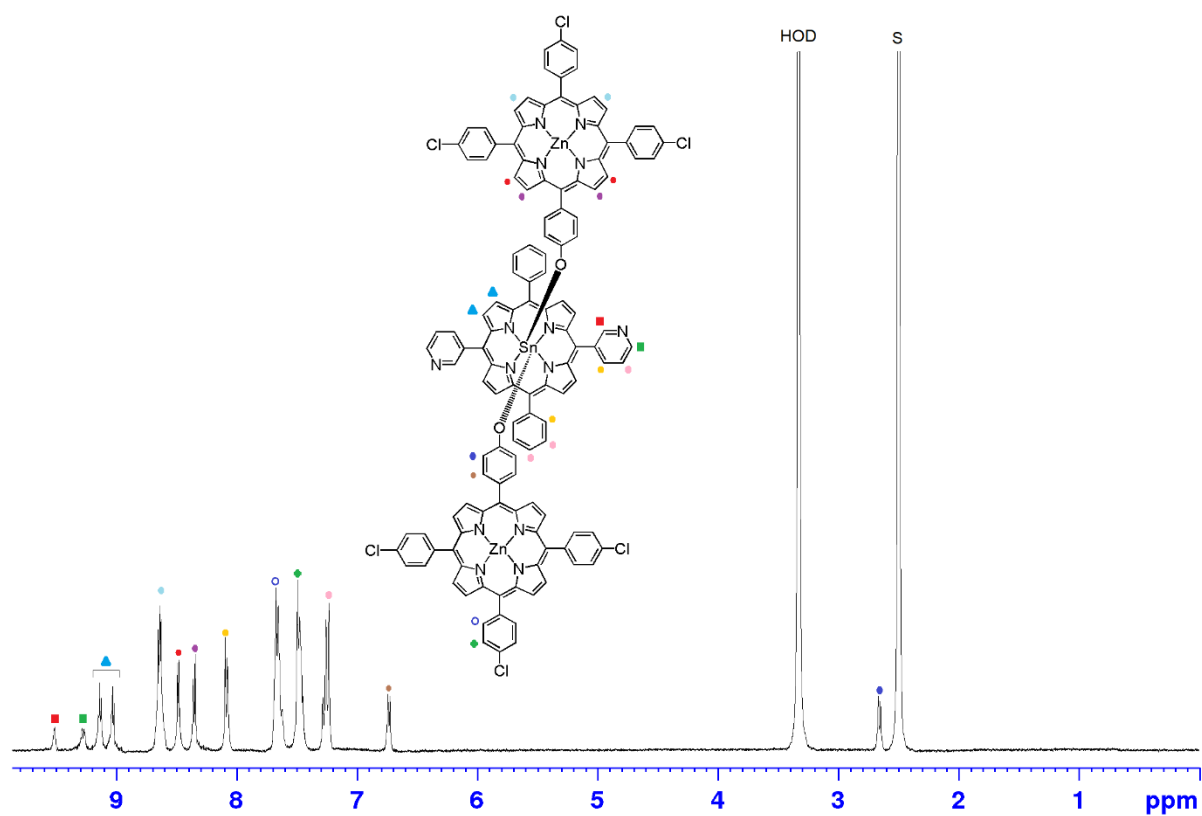

**Figure S17.**  $^1\text{H}$  NMR spectrum of triad **5** in  $\text{DMSO-d}_6$ .

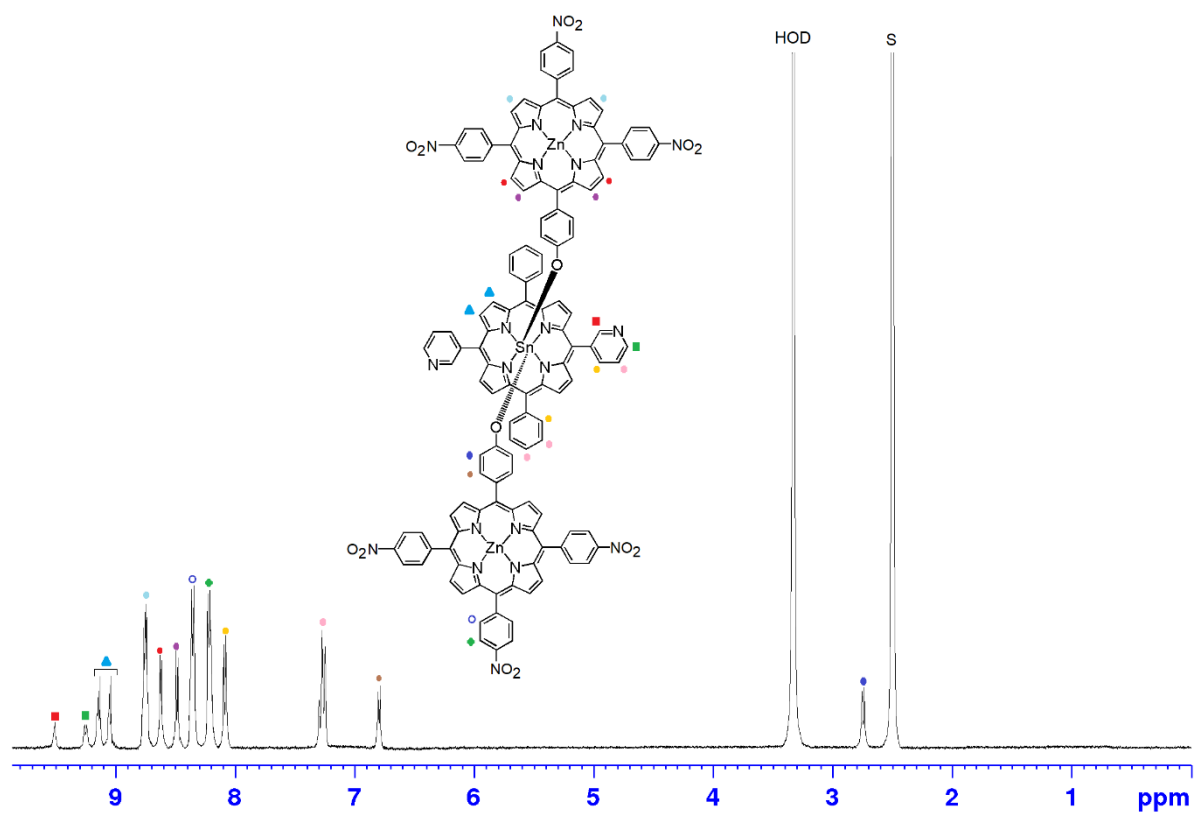

**Figure S18.**  $^1\text{H}$  NMR spectrum of triad **6** in  $\text{DMSO-d}_6$ .

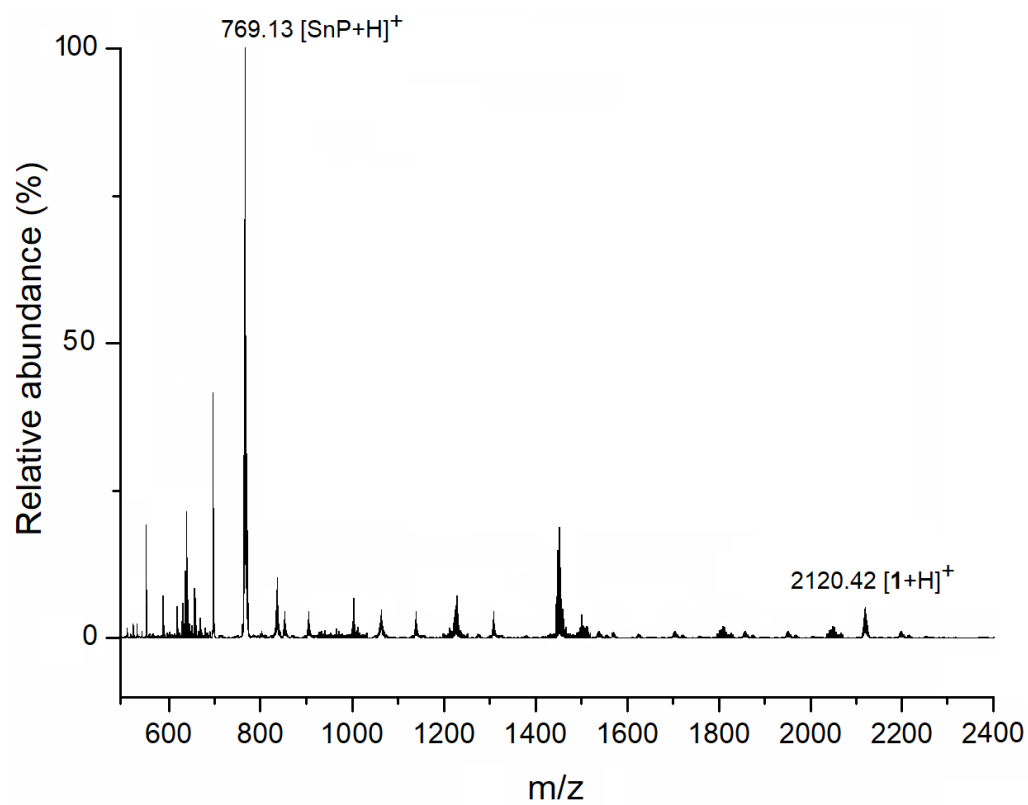

**Figure S19.** ESI-MS spectrum of triad **1**.

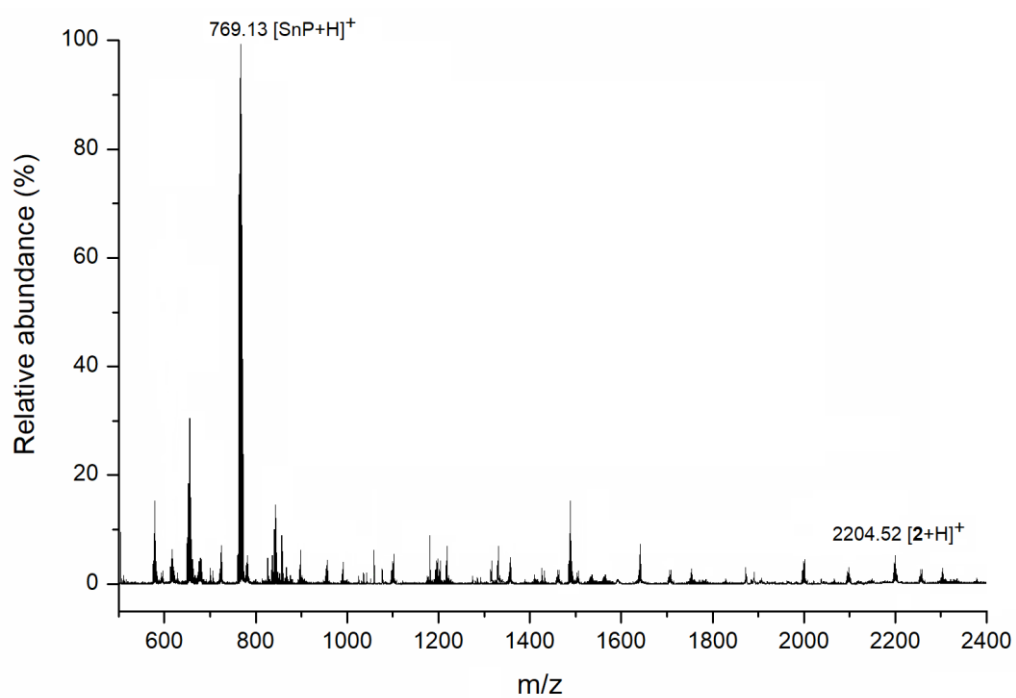

**Figure S20.** ESI-MS spectrum of triad **2**.

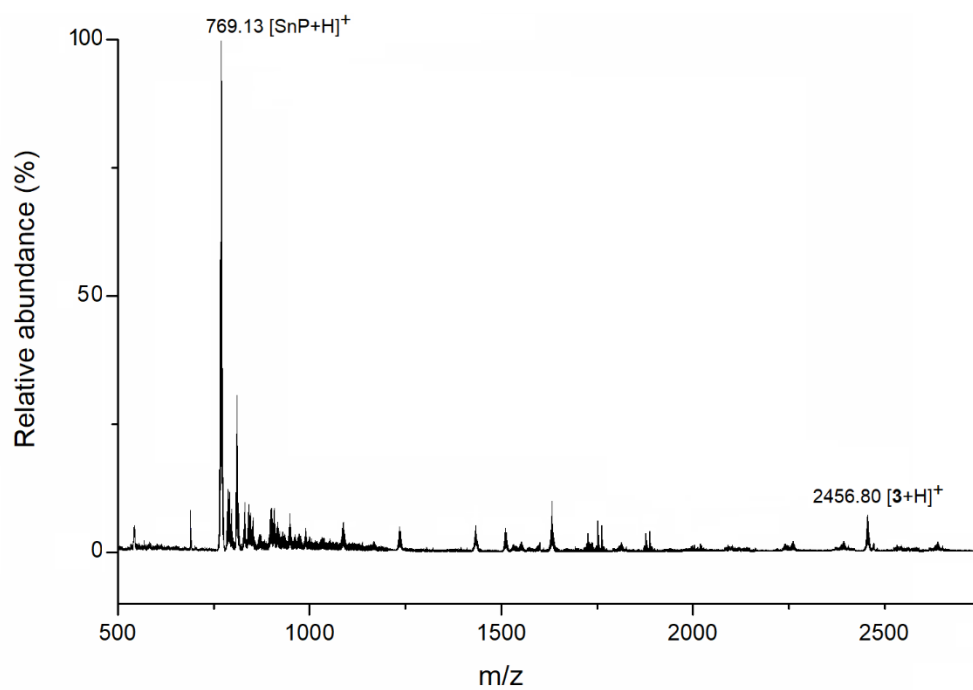

**Figure S21.** ESI-MS spectrum of triad **3**.

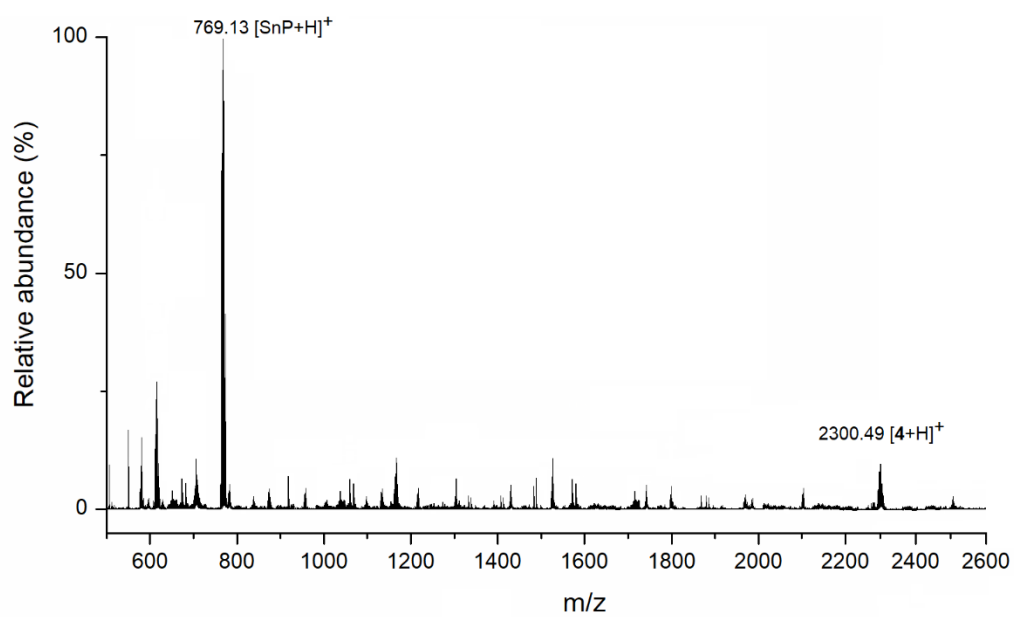

**Figure S22.** ESI-MS spectrum of triad **4**.

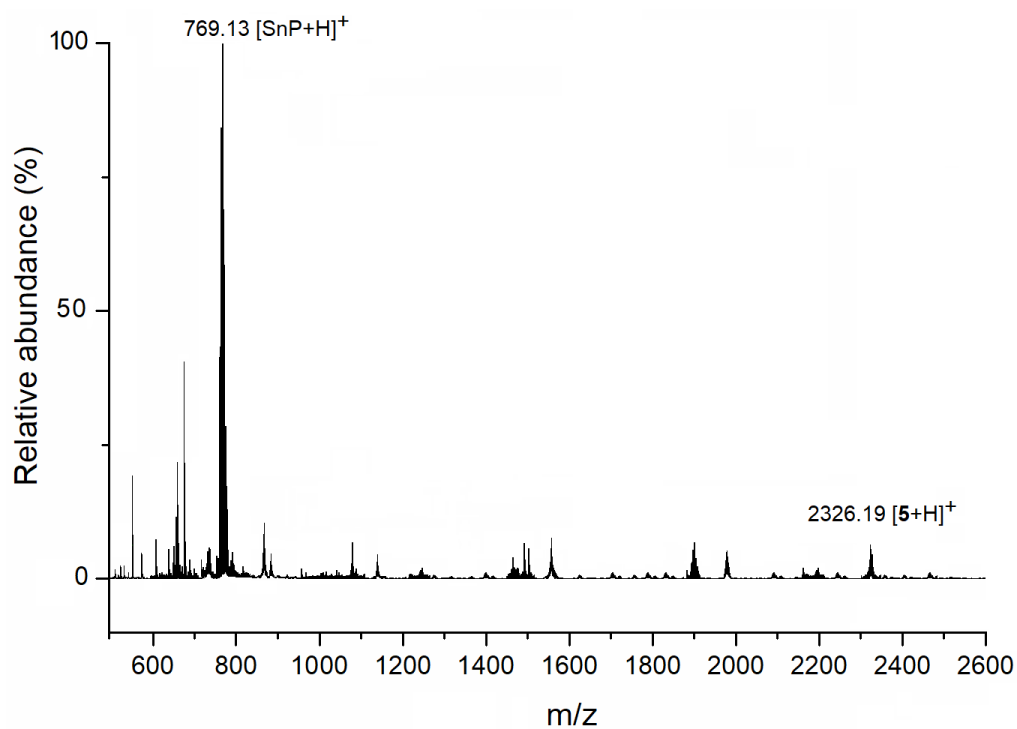

**Figure S23.** ESI-MS spectrum of triad 5.

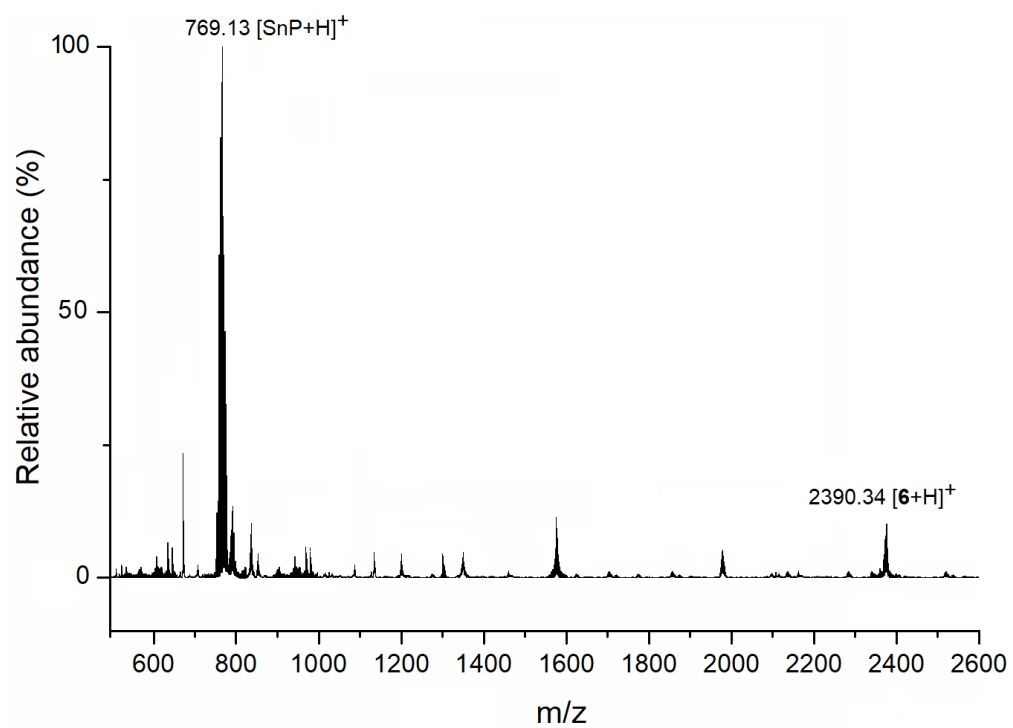

**Figure S24.** ESI-MS spectrum of triad 6.

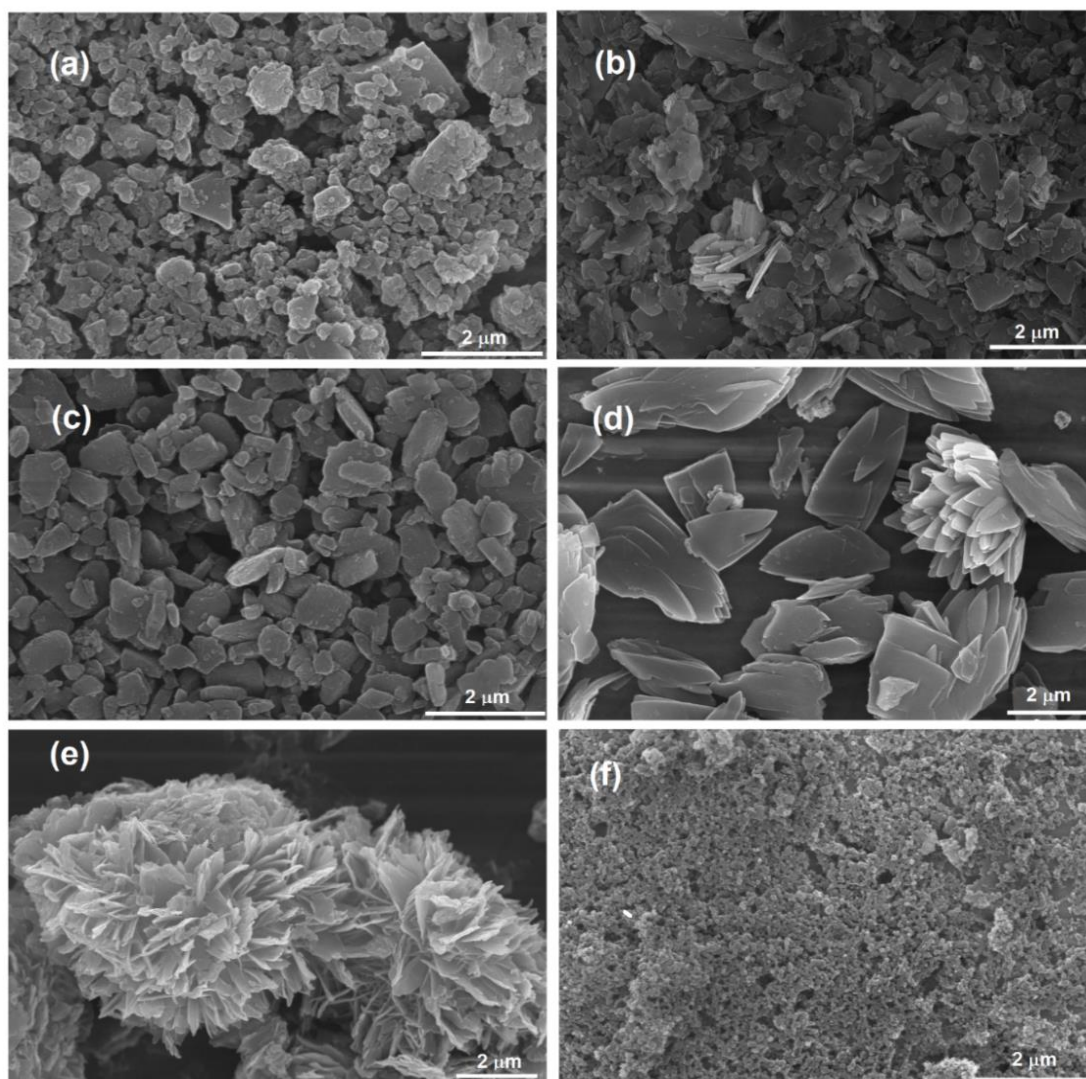

**Figure S25.** Lower magnification of FE-SEM images for the assembly patterns of triads: (a) **1**; (b) **2**; (c) **3**; (d) **4**; (e) **5**; (f) **6**.

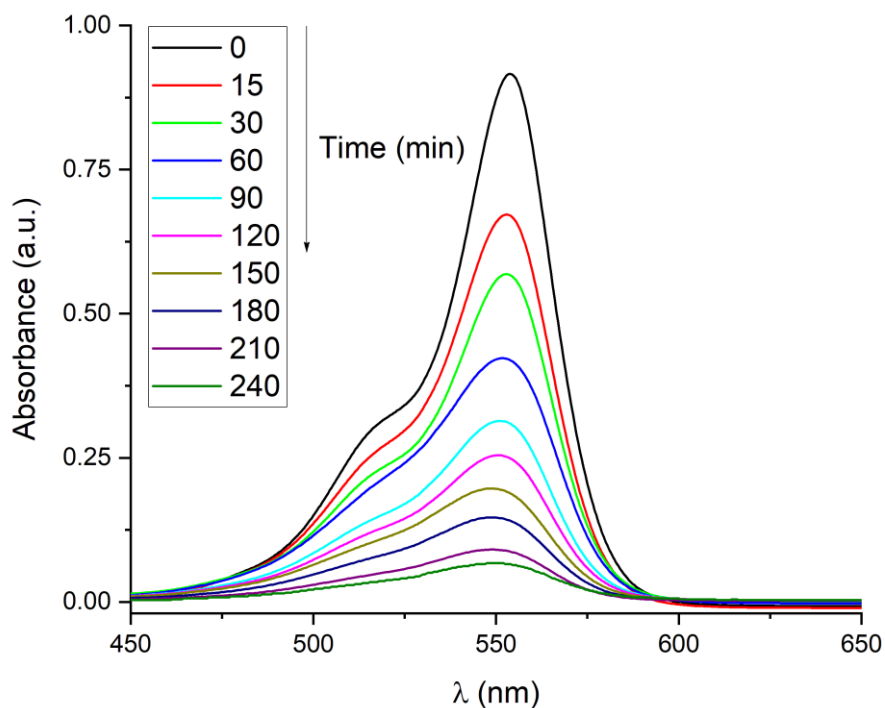

**Figure S26.** Absorption spectra of RhB in the presence of nano fibers derived from triad **3** under visible light irradiation.

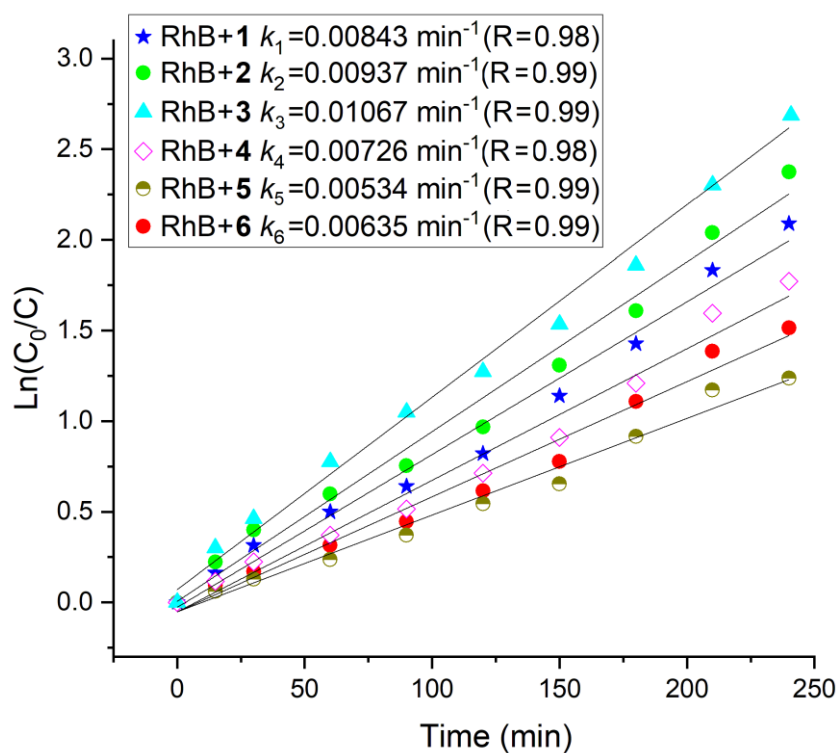

**Figure S27.** Kinetics for the photocatalytic degradation of RhB under visible light irradiation of the six triads (**1-6**).



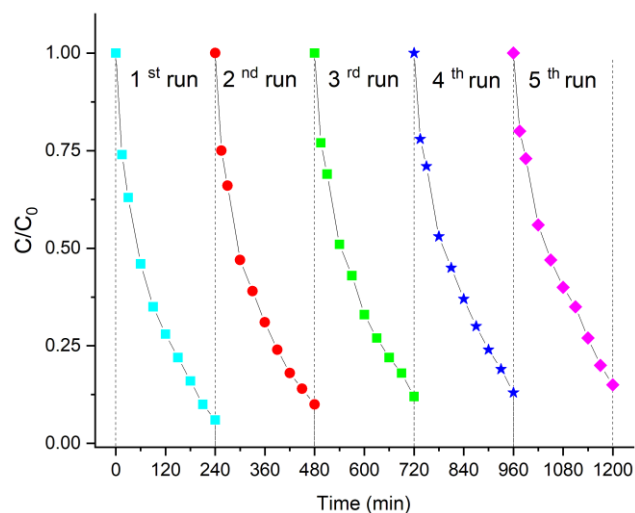

**Figure S28.** Catalytic cycles (up to 5 cycles) using triad **3** as a photocatalyst for the degradation of RhB.

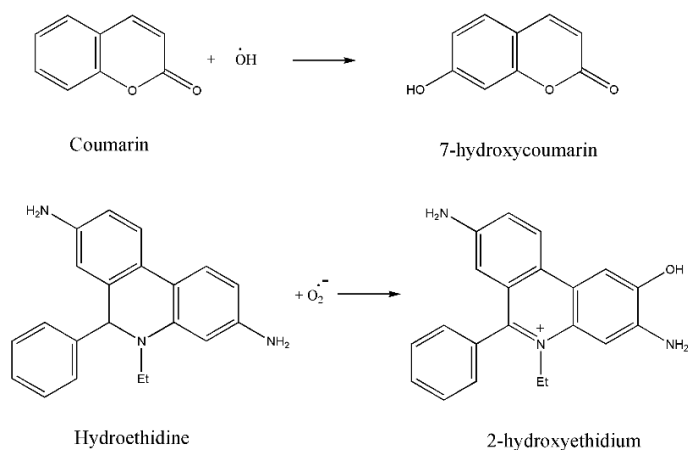

**Figure S29.** Schematic representation of the detection of the hydroxyl and superoxide radical anion that were generated during the photodegradation experiments.

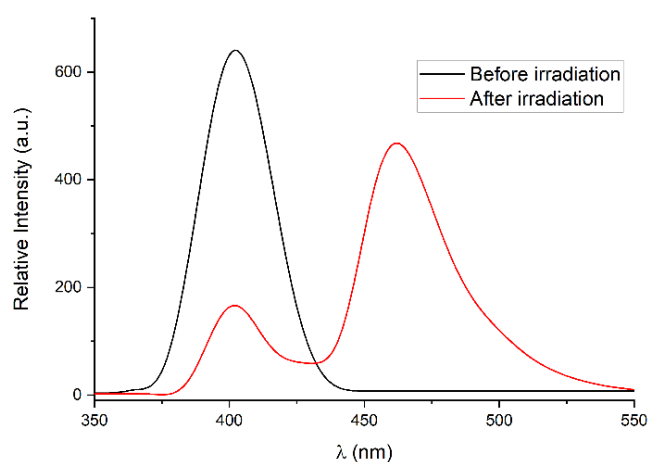

**Figure S30.** UV-Visible spectra of coumarin in the presence of triad **3** in water.  $\lambda_{\text{ex}} = 325$  nm and light exposure time (30 min).
